# Supplementary material
Source: PubMed Central journal article supplement (PMC4920322)
Supplement: rspb20160690supp1.pdf [file rspb20160690supp1.pdf]

**Supplemental Table 1:** Summary of 44 satellite tracked juvenile loggerhead sea turtles released off Japan in 2010 and 2011.

4

| Track ID | SCL (cm) | Age (months) | Captive/Wild Caught | Deploy Date | Deploy Latitude | Deploy Longitude | Date Terminated | Distance Traveled (km) | Days Transmitted |
|----------|----------|--------------|---------------------|-------------|-----------------|------------------|-----------------|------------------------|------------------|
| 22278_10 | 36.0     | 20           | Captive             | 9-Apr-10    | 29.7            | 130.5            | 17-Jan-11       | 7201                   | 283              |
| 22279_10 | 36.8     | 20           | Captive             | 9-Apr-10    | 29.7            | 130.5            | 25-Feb-11       | 7641                   | 322              |
| 25358_10 | 34.7     | 20           | Captive             | 9-Apr-10    | 29.7            | 130.5            | 29-Mar-11       | 7995                   | 354              |
| 25360_10 | 40.7     | 20           | Captive             | 9-Apr-10    | 29.7            | 130.5            | 15-Jul-11       | 12226                  | 462              |
| 40703_10 | 35.4     | 20           | Captive             | 9-Apr-10    | 29.7            | 130.5            | 27-Jul-11       | 9968                   | 474              |
| 40719_10 | 38.1     | 20           | Captive             | 9-Apr-10    | 29.7            | 130.5            | 23-Feb-11       | 7662                   | 320              |
| 40725_10 | 37.3     | 20           | Captive             | 9-Apr-10    | 29.7            | 130.5            | 27-Feb-11       | 6731                   | 324              |
| 42715_10 | 34.0     | 20           | Captive             | 9-Apr-10    | 29.7            | 130.5            | 25-Apr-11       | 9324                   | 381              |
| 42717_10 | 37.9     | 20           | Captive             | 9-Apr-10    | 29.7            | 130.5            | 10-Sep-11       | 10915                  | 519              |
| 50138_10 | 36.3     | 20           | Captive             | 9-Apr-10    | 29.7            | 130.5            | 19-Sep-11       | 11536                  | 528              |
| 50154_10 | 35.4     | 20           | Captive             | 9-Apr-10    | 29.7            | 130.5            | 11-Jan-11       | 6327                   | 277              |
| 50158_10 | 35.9     | 20           | Captive             | 9-Apr-10    | 29.7            | 130.5            | 31-May-11       | 10346                  | 417              |
| 52703_10 | 38.5     | 20           | Captive             | 9-Apr-10    | 29.7            | 130.5            | 19-Oct-11       | 11549                  | 558              |
| 57146_10 | 32.8     | 20           | Captive             | 9-Apr-10    | 29.7            | 130.5            | 16-May-11       | 9573                   | 402              |
| 65415_10 | 33.3     | 20           | Captive             | 9-Apr-10    | 29.7            | 130.5            | 29-Jan-11       | 7457                   | 295              |
| 65416_10 | 38.9     | 20           | Captive             | 9-Apr-10    | 29.7            | 130.5            | 2-Jan-11        | 5937                   | 268              |
| 65417_10 | 37.6     | 20           | Captive             | 9-Apr-10    | 29.7            | 130.5            | 9-Jun-11        | 11978                  | 426              |
| 19595_11 | 39.1     | 24           | Captive             | 12-Jul-11   | 37.5            | 143.1            | 14-Sep-13       | 16719                  | 795              |
| 22151_11 | 34.9     | 24           | Captive             | 12-Jul-11   | 36.7            | 142.6            | 29-Oct-13       | 14001                  | 840              |
| 22168_11 | 35.6     | 24           | Captive             | 12-Jul-11   | 36.1            | 143.6            | 2-Feb-13        | 13521                  | 571              |
| 22535_11 | 34.9     | 24           | Captive             | 12-Jul-11   | 36.4            | 143.9            | 28-Feb-13       | 11936                  | 597              |
| 23002_11 | 37.4     | 24           | Captive             | 12-Jul-11   | 36.3            | 141.2            | 23-Nov-13       | 17863                  | 865              |
| 23045_11 | 36.0     | 24           | Captive             | 12-Jul-11   | 36.6            | 144.6            | 16-Feb-13       | 12012                  | 585              |
| 40471_11 | 34.7     | 24           | Captive             | 12-Jul-11   | 36.4            | 142.4            | 4-Feb-13        | 11892                  | 573              |

|          |      |    |         |           |      |       |           |       |     |
|----------|------|----|---------|-----------|------|-------|-----------|-------|-----|
| 41315_11 | 38.3 | 24 | Captive | 12-Jul-11 | 35.7 | 141.3 | 14-Oct-12 | 8336  | 460 |
| 42711_11 | 36.3 | 24 | Captive | 12-Jul-11 | 35.7 | 141.3 | 3-Nov-12  | 10350 | 480 |
| 42714_11 | 36.6 | 24 | Captive | 12-Jul-11 | 36.6 | 141.7 | 5-Sep-13  | 15490 | 786 |
| 50146_11 | 37.9 | 24 | Captive | 12-Jul-11 | 36.5 | 143.6 | 15-Jul-13 | 12076 | 734 |
| 50152_11 | 34.6 | 24 | Captive | 12-Jul-11 | 35.7 | 141.3 | 31-Jan-12 | 4616  | 203 |
| 52693_11 | 51.8 | 36 | Captive | 12-Jul-11 | 35.7 | 141.3 | 28-Jul-12 | 11112 | 382 |
| 52694_11 | 57.4 | 36 | Captive | 12-Jul-11 | 35.7 | 141.3 | 1-Jan-12  | 5356  | 173 |
| 52697_11 | 59.4 | 36 | Captive | 12-Jul-11 | 35.7 | 141.3 | 27-Sep-12 | 10265 | 443 |
| 53754_11 | 58.2 | 36 | Captive | 12-Jul-11 | 35.7 | 141.3 | 1-Jul-12  | 10387 | 355 |
| 53769_11 | 34.5 | 24 | Captive | 12-Jul-11 | 35.7 | 141.3 | 3-Dec-12  | 10660 | 510 |
| 57147_11 | 36.2 | 24 | Captive | 12-Jul-11 | 35.7 | 141.3 | 25-Jul-12 | 8053  | 379 |
| 57150_11 | 35.1 | 24 | Captive | 12-Jul-11 | 35.7 | 141.3 | 14-Oct-12 | 8301  | 460 |
| 65421_11 | 36.5 | 24 | Captive | 12-Jul-11 | 34.8 | 146.6 | 20-Apr-13 | 13754 | 648 |
| 65433_11 | 38.9 | 24 | Captive | 12-Jul-11 | 35.7 | 141.3 | 2-Aug-12  | 9591  | 387 |
| 68330_11 | 38.6 | 24 | Captive | 12-Jul-11 | 36.9 | 142.9 | 17-Mar-13 | 15289 | 614 |
| 68331_11 | 38.2 | 24 | Captive | 12-Jul-11 | 36.5 | 142.3 | 18-Feb-13 | 11425 | 587 |
| 68335_11 | 36.2 | 24 | Captive | 12-Jul-11 | 35.7 | 141.3 | 17-Oct-12 | 9934  | 463 |
| 68336_11 | 36.9 | 24 | Captive | 12-Jul-11 | 36.1 | 142.5 | 26-Apr-13 | 13595 | 654 |
| 88054_11 | 36.5 | 24 | Captive | 12-Jul-11 | 35.7 | 141.3 | 4-Oct-12  | 8242  | 450 |
| 88068_11 | 40.5 | NA | Captive | 12-Jul-11 | 35.7 | 141.3 | 6-Apr-12  | 6102  | 269 |

6

8
