# Supplementary material
Source: PubMed Central journal article supplement (PMC4920322)
Supplement: rspb20160690supp2.pdf [file rspb20160690supp2.pdf]

Supplemental Figure 1.

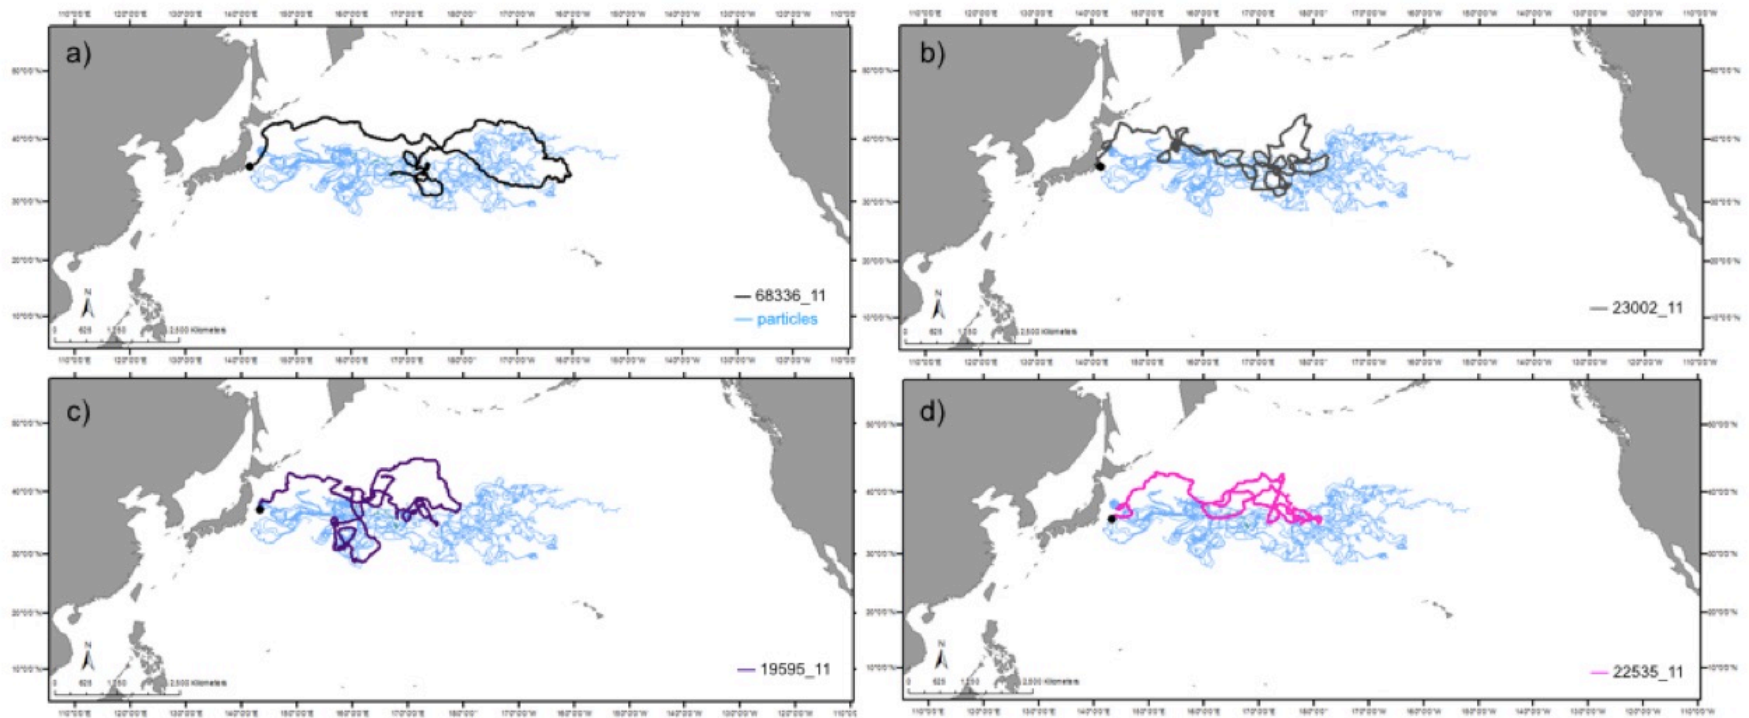

Supplemental Figure 1.

Movements of the several of the longest transmitting juvenile loggerhead tracks (color lines, a-d) deployed between 2010-2011, compared to the trajectories of 10 randomly selected simulated particle paths (blue lines). Transit times for these four tracks were 734, 865, 795, and 597 days, respectively; for selected particles, 730 days. In each panel, deploy location is shown with a black dot.
